# Supplementary material for: Quantitative proteomics reveals FLNC as a potential progression marker for the development of hepatocellular carcinoma
Source: PubMed Central journal article supplement (PMC5354476; doi:10.18632/oncotarget.11921), 2016-09-09
Supplement: oncotarget-07-68242-s001.pdf [file oncotarget-07-68242-s001.pdf]

# Quantitative proteomics reveals FLNC as a potential progression marker for the development of hepatocellular carcinoma

## Supplementary Materials

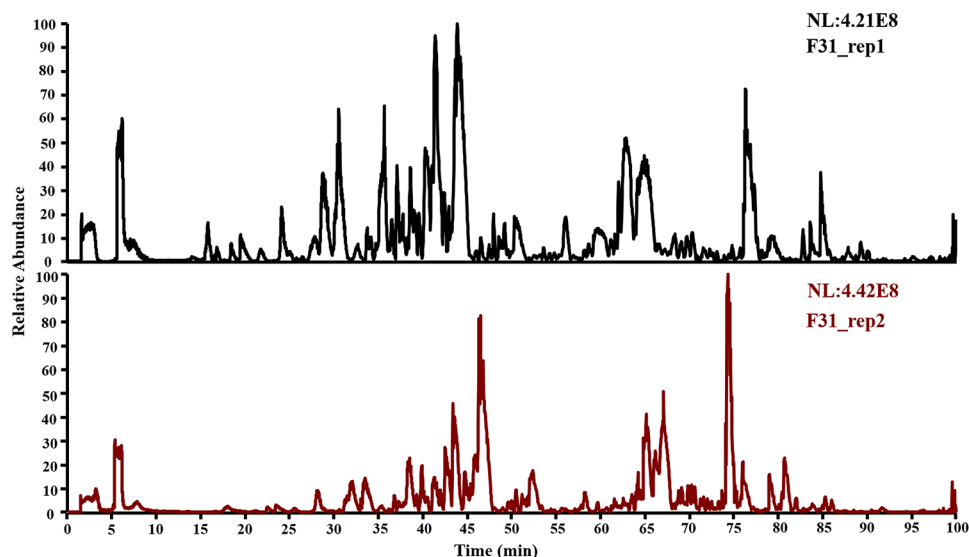

Supplementary Figure S1: Representative extracted ion current (XIC) analysis for LC-MS/MS on the iTRAQ labeled samples.

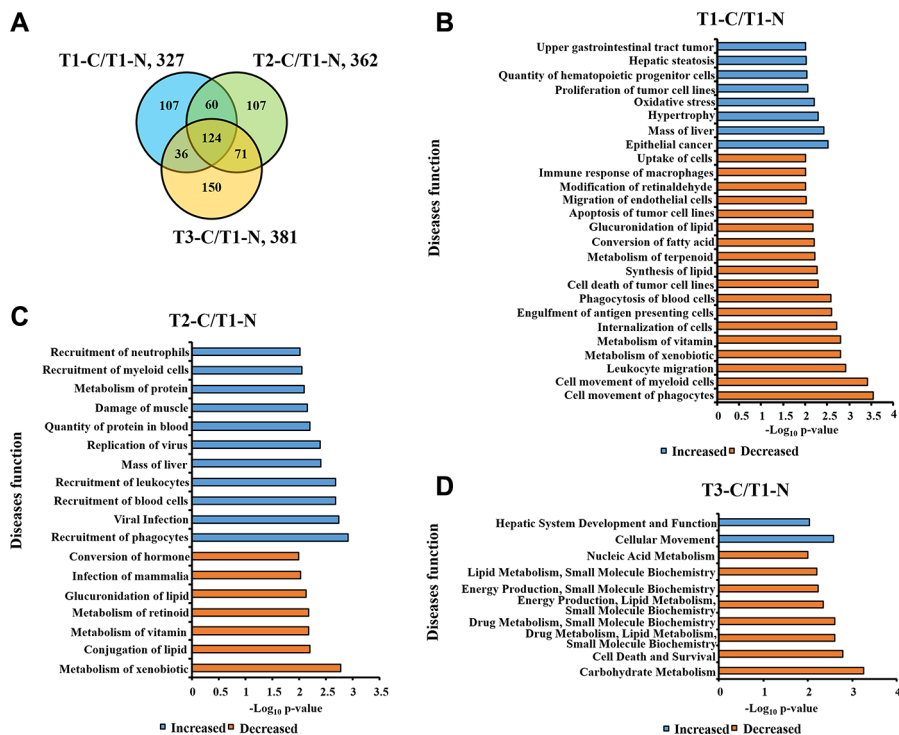

Supplementary Figure S2: Differential expression analysis for pathways. (A) The Venn diagram of the differentially expressed proteins in T1-C/T1-N, T2-C/T1-N, and T3-C/T1-N. (B–D) The diseases and function pathway analysis of the differentially expressed proteins in T1-C/T1-N, T2-C/T1-N and T3-C/T1-N, respectively.

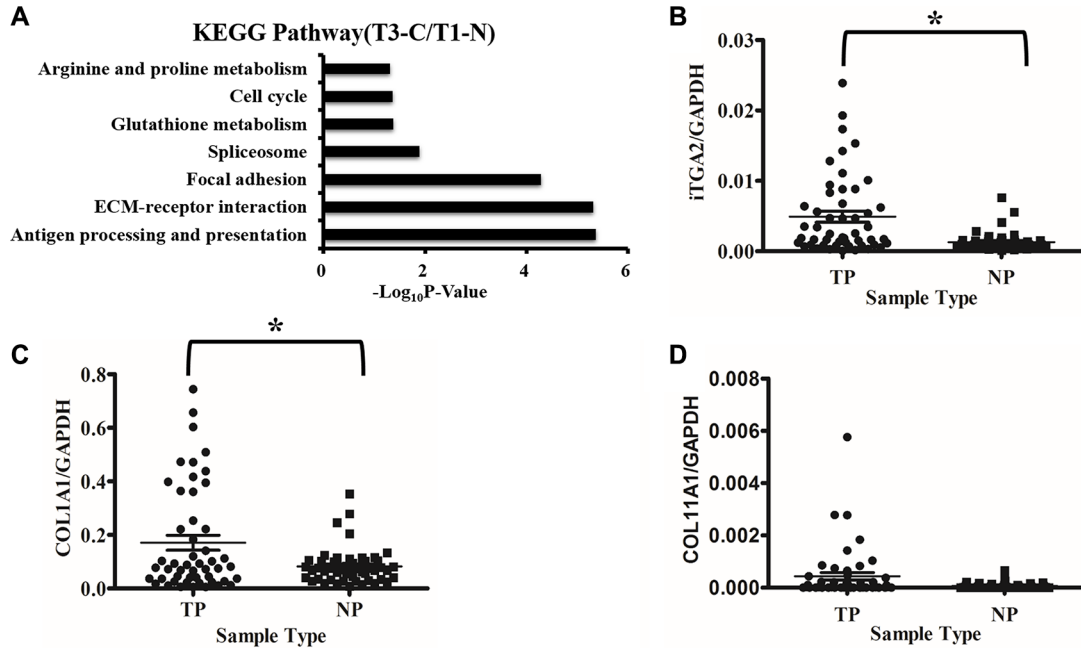

**Supplementary Figure S3: iTGA2, COL1A1 and COL11A1 proteins were up-regulated in live cancer tissues, which belong to tumor invasion and metastasis-related proteins.** (A) KEGG pathway analysis of T3-C vs T1-N differential proteins. (B) The scatterplot of mRNA expression of iTGA2 in the 50 pairs of tumor and non-tumor tissues collected from TCGA RNA-Seq database. (C) The scatterplot of mRNA expression of COL1A1 in the 50 pairs of tumor and non-tumor tissues collected from TCGA RNA-Seq database. (D) The scatterplot of mRNA expression of COL11A1 in the 50 pairs of tumor and non-tumor tissues collected from TCGA RNA-Seq database.

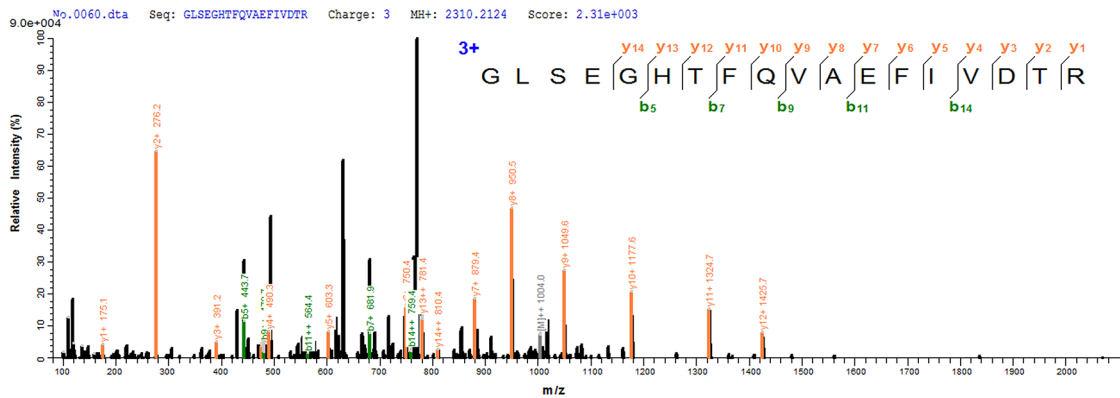

**Supplementary Figure S4: Representative mass spectra of FLNC.**

**Supplementary Table S1: The list of quantitative proteins.** See Supplementary\_Table\_S1

**Supplementary Table S2: GO analysis for cell components of the identified proteins.**

See Supplementary\_Table\_S2

**Supplementary Table S3: The list of differentially expressed proteins between T1-C and T1-N.**

See Supplementary\_Table\_S3

**Supplementary Table S4: The list of differentially expressed proteins between T2-C and T1-N.**

See Supplementary\_Table\_S4

**Supplementary Table S5: The list of differentially expressed proteins between T3-C and T1-N.**

See Supplementary\_Table\_S5

**Supplementary Table S6: The K-Means clustering of differentially expressed proteins.**

See Supplementary\_Table\_S6
